# General cognitive performance declines with female age and is negatively related to fledging success in a wild bird

Camilla Soravia<sup>1</sup>; Benjamin J. Ashton<sup>1,2,4</sup>; Alex Thornton<sup>3</sup>; Amanda R. Ridley<sup>1,4</sup>

<sup>1</sup>*Centre of Evolutionary Biology, School of Biological Sciences, University of Western Australia, Perth, WA, Australia*

<sup>2</sup>*School of Natural Sciences, Macquarie University, Sydney, NSW, Australia*

<sup>3</sup>*Centre for Ecology and Conservation, University of Exeter, Penryn, UK*

<sup>4</sup>*FitzPatrick Institute of African Ornithology, University of Cape Town, Cape Town, South Africa*

Camilla Soravia (corresponding author) ORCID: 0000-0002-9795-9677

Benjamin J. Ashton ORCID: 0000-0003-3357-0395

Alex Thornton ORCID: 0000-0002-1607-2047

Amanda R. Ridley ORCID: 0000-0001-5886-0992

## ABSTRACT

Identifying the causes and fitness consequences of intraspecific variation in cognitive performance is fundamental to understand how cognition evolves. Selection may act on different cognitive traits separately or jointly as part of the general cognitive performance of the individual. To date, few studies have examined simultaneously whether individual cognitive performance covaries across different cognitive tasks, the relative importance of individual and social attributes in determining cognitive variation, and its fitness consequences in the wild. Here, we tested 38 wild southern pied babblers (*Turdoides bicolor*) on a cognitive test battery targeting associative learning, reversal learning and inhibitory control. We found that a single factor explained 59.5% of the variation in individual cognitive performance across tasks, suggestive of a general cognitive factor. General cognitive performance varied by age and sex; declining with age in females but not males. Older females also tended to produce a higher average number of fledglings per year compared to younger females. Analysing over 10 years of breeding data, we found that individuals with lower general cognitive performance produced more fledglings per year. Collectively, our findings support the existence of a trade-off between cognitive performance and reproductive success in a wild bird.

**Keywords** cooperative breeding, southern pied babbler, general intelligence, cognitive senescence, sex-differences, cognition

## 1. INTRODUCTION

1 The mental mechanisms through which animals acquire, process, store and act on information from  
2 the environment represent animal cognition [1]. Animals use cognitive mechanisms to adjust their  
3 behavioural responses to the environmental and social context, remember the location of resources,  
4 and learn which environmental cues indicate presence of food, mates or predators [2]. Different  
5 animal species rely on cognitive mechanisms to different extents to solve ecological problems [e.g. 3,  
6 4], and even within a species, cognitive performance can vary significantly among individuals [e.g. 5,  
7 6]. Such great inter-and intraspecific variation has led to the question: what selective pressures shape  
8 the evolution of cognition?

9 Intraspecific studies of animal cognition have shown that in some cases cognitive performance is  
10 heritable [7]. Additionally, cognitive performance has been linked to mate choice [8], reproductive  
11 investment [6], reproductive success [5, 9], and survival [10]. The existence of differential fitness  
12 arising from heritable variation in cognitive performance means cognitive traits can evolve [11].  
13 However, better cognitive performance is not always associated with increased fitness, for example,  
14 faster learning is associated with reduced longevity in fruit flies (*Drosophila melanogaster*) [12]. This  
15 may occur because the energetic costs of enhanced cognitive function lead to a trade-off between  
16 resource allocation to cognitive performance and somatic maintenance or reproduction [11, 13].  
17 Therefore, we expect selection to favour cognitive performance only when the benefits outweigh the  
18 costs [13].

19 To understand how selection acts on cognition, the link between cognitive variation and fitness  
20 consequences needs to be identified, as well as the proximate causes of individual variation in  
21 cognitive performance. Several factors have been associated with differences in individual cognitive  
22 performance, including the physical and social environment [14, 15], and individual attributes such as  
23 age [e.g. 16], rank [e.g. 17], and sex [e.g. 18]. Sex differences in cognitive performance often arise as  
24 a consequence of mating strategies or sex-specific ecological constraints [19, 20]. For example, in the

25 brood-parasitic brown headed cowbird (*Molothrus ater*), females outperform males on a large-scale  
26 spatial memory task, likely because the breeding strategy of this species relies on females finding  
27 potential host nests to lay their eggs in [21].

28 Age differences in cognitive performance have been mostly found when comparing juveniles and  
29 adults [22, 23]. However, cognitive performance can also change during adult life [24, 25]. The gradual  
30 reduction of cognitive function with age is known as cognitive senescence [26]. Evidence for cognitive  
31 senescence in non-human animals is largely limited to captive studies [24, 27]. For example, homing  
32 pigeons (*Columba livia*) older than 10 years returned more often to feeders that they had just depleted  
33 despite them being empty, showing impaired short-term memory [16]. To date, little is known about  
34 cognitive senescence in the wild, due to logistical limitations including difficulties of estimating  
35 individuals' age [28] and testing cognition in the wild [29].

36 During social interactions, individuals can differ in rank, where dominant individuals often monopolize  
37 resources [30]. There is growing evidence that cognitive performance is related to rank, but the  
38 direction of this relationship varies across studies [31, 32]. It has been suggested that cognitive  
39 performance may not be related to social status *per se*, but to factors correlated to rank, such as  
40 vigilance, neophobia or motivation to find alternative food sources [17, 32]. For example, in Arabian  
41 babblers (*Argya squamiceps*) subordinates were the first to learn to remove black lids in a novel  
42 foraging task, likely because they were more explorative, but dominants, which tend to be older in  
43 this species, were better able to generalise the solution to white lids because of experience [33, 34].  
44 Finally, individual cognitive performance may also be linked to social group size because living in larger  
45 groups may require better cognitive performance in order to monitor the state and actions of group  
46 members, remember their identity, and the outcome of past interactions [5, 14]. Despite the growing  
47 number of studies investigating intraspecific differences in cognitive performance, these individual  
48 and social attributes (rank, sex, age and group size) have rarely been examined simultaneously while

49 controlling for proxies of motivation, and evidence of their relative importance in driving cognitive  
50 variation is scarce.

51 If we identify what selection pressures drive variation in cognition, the question of whether these act  
52 on each cognitive trait separately, or jointly as part of general cognitive processes, remains. In humans,  
53 it has been repeatedly demonstrated that individual performance correlates positively across different  
54 cognitive tasks, and approximately 40% of the total variation in performance can be explained by a  
55 single general cognitive factor  $g$  [35]. This factor, also referred to as general intelligence or intelligence  
56 quotient (IQ), predicts important life outcomes, such as occupational attainment, health and longevity  
57 [36]. Recently, several studies in non-human animals have also described something akin to a general  
58 cognitive factor  $g$  explaining between 30%-60% of variation in cognitive performance across a battery  
59 of cognitive tasks [reviewed in 37]. The evidence for  $g$  provided by animal studies however has  
60 encountered criticism. First, generating reliable measures of  $g$  in non-human animals requires the use  
61 of robust psychometric test batteries targeting well-studied cognitive traits [38]. It is also worth noting  
62 that variation in the combination of cognitive tasks used in a test battery can lead to different  
63 estimates of  $g$  [39]. Second, results indicative of  $g$  may also arise in the absence of a truly general  
64 cognitive factor if performance on different tasks is underpinned by the same cognitive mechanism –  
65 for instance, variation in associative learning performance could potentially impact performance  
66 across a range of tasks [40]. Therefore, the single factor extracted from animal cognitive test batteries  
67 does not necessarily equate to general intelligence or  $g$  as described in humans. Nonetheless, if  
68 performance measured across a battery of cognitive tasks can be explained by a single factor,  
69 hereafter referred to as “general cognitive performance (GCP)” [5, 41], and this factor predicts fitness  
70 in the wild [5], then it may represent a measurable cognitive trait which may be under selection in  
71 animal populations [35].

72 Here, we tested wild adult southern pied babblers (hereafter “babblers”, *Turdoides bicolor*) on a  
73 psychometric test battery containing three tasks designed to quantify (1) associative learning, (2)

74 reversal learning, (3) inhibitory control. These are well-studied cognitive traits that span different  
75 domains [38, 42]. Additionally, they are likely to be ecologically relevant as they allow individuals to:  
76 learn predictive contingencies between environmental cues (associative learning); learn a new  
77 association when the previous one stops being rewarding (reversal learning); and control prepotent  
78 motor responses when counterproductive (inhibitory control) [42, 43]. To achieve a comprehensive  
79 understanding of the relationship between different cognitive traits, the factors underpinning  
80 interindividual variation in cognition and the link between cognitive performance and fitness in a wild  
81 animal population, we: (a) tested whether individual cognitive performance was positively correlated  
82 across tasks and could be explained by a single factor (GCP); (b) measured proxies of motivation and  
83 attributes of the individual and social group (age, sex, rank, group size) to identify determinants of  
84 individual cognitive performance; and (c) related individual cognitive performance to multiple  
85 measures of reproductive success.

## 86 **2. METHODS**

### 87 **2.1 Study site and species**

88 Data were collected at the Kuruman River Reserve (26°58' S, 21°49' E; South Africa, 33 km<sup>2</sup>) between  
89 September-March in 2018, 2019 and 2021. The reserve is situated within the semi-arid Kalahari region,  
90 which is characterized by vegetated sand dunes [44]. Pied babblers are medium-sized (60-90 g),  
91 sexually monomorphic passerines endemic to this region. They are cooperative breeders and live in  
92 groups, which include a dominant breeding pair and subordinate helpers [45]. The dominant pair  
93 produces approximately 95% of the offspring [46, 47]. Pair bond tenure varies greatly (from < 1 month  
94 to > 5 years) [48]. All adult group members (> 1 year post-hatching) engage in care of young and  
95 territory defence [45]. Each group defends a territory of 50-80 hectares year-round [49]. On average  
96 only 4% of subordinates live in non-natal groups each year [46].

97 The study population has been monitored since 2003 and is habituated to human presence [45], which  
98 allows researchers to observe the birds' natural behaviour from a close distance (< 5 m) and to present

99 them with cognitive tasks. Ringing and blood sampling for molecular sexing are performed on nestlings  
100 11 days post-hatching [50]. Therefore, each bird in the study population is identifiable by a unique  
101 ring combination, and sex and age are known for all adult birds. Adult immigrants are trapped with a  
102 walk-in trap for ringing and blood sampling. We considered immigrants to be at least one year old at  
103 the time they immigrated into our study population, and if they immigrated as dominants and bred  
104 on the first year in which they immigrated we considered them to be at least two years old, as dispersal  
105 and first breeding are rarely recorded before these ages respectively [48, 51]. On average, subordinate  
106 individuals are younger than dominants [51]. Rank (dominant vs subordinate) is easily inferred from  
107 aggressive displays by the dominant individuals towards subordinates [45], and distinctive affiliative  
108 behaviours between dominants [48]; in addition, only the dominant female incubates the nest  
109 overnight [45]. During the study years (2018-2021), the population comprised 14 groups ranging in  
110 size from two to seven adults. We tested different individuals each year: 13 individuals from six groups  
111 in 2018, 18 from 10 groups in 2019 and seven from four groups in 2021. Among the birds tested in  
112 2021, four were unringed when tested because we found them as yearlings after a year's gap in data  
113 collection (fieldwork in 2020 was suspended due to the COVID-19 outbreak). We were able to identify  
114 these birds based on distinctive individual features (e.g. plumage or scarring), but their sex was  
115 unknown. Sex was unknown also for two other ringed individuals tested in 2021 due to delays in the  
116 analysis of blood samples caused by COVID-19.

## 117 **2.2 Cognitive test battery**

118 The cognitive test battery consisted of three tasks designed to quantify (1) associative learning, (2)  
119 reversal learning, (3) inhibitory control. These cognitive tasks tapped into the natural terrestrial  
120 foraging behaviour of babblers [45], as they required them to peck downwards at a lid or move around  
121 a barrier on the ground to retrieve a food reward: a mealworm (*Tenebrio molitor* larva). The original  
122 cognitive test battery included a spatial memory task, but this was later excluded because individuals'

123 behaviour when interacting with the task did not deviate from a random sampling strategy (see  
124 Supplementary Material section 3).

125 Cognitive testing was conducted between 5 am and 7 pm, when babblers were active. Cognitive tasks  
126 were always presented in the shade when the birds were not showing any heat dissipation behaviours  
127 (i.e. panting and wingspreading) to avoid potential confounding effects of heat stress on cognitive  
128 performance [52]. All trials in a cognitive test were performed when the focal individual was  
129 temporarily out of sight of other group members. This was achievable because of the short trial  
130 duration (< 1 min) and because babblers often forage over 10 m apart from each other [53]. The three  
131 cognitive tests were carried out at least 24h apart and the order was randomised within individual,  
132 except for the reversal learning, which was always carried out the day after the associative learning  
133 test. Prior to quantifying learning performance, individuals were trained to peck the lids in a cognitive  
134 task to find a food reward using unpainted lids (see Supplementary Material section 1). In all tasks, if  
135 the focal bird did not interact with the task for 30 min, the test was paused and continued the  
136 following day, and if the passing criterion was not reached by 120 trials, the test was stopped.

### 137 *2.2.1 Associative and reversal learning*

138 The task used to quantify associative and reversal learning consisted of a small wooden block (180 x  
139 70 x 30 mm) with two equidistant circular wells (30 mm diameter, 20 mm depth) covered by painted  
140 wooden lids. The lids were held in place by elastic bands; in this way, they fitted snugly into the wells,  
141 preventing the bird from using visual cues to identify the rewarded well, but they could swivel when  
142 pecked, making the food reward accessible to the bird (Figure 1A). The two lids were painted a dark  
143 and light shade of the same colour rather than two different colours to avoid effects of past experience  
144 or colour salience on learning performance [e.g. 29, 41; hereafter “colours” instead of “colour shades”  
145 for brevity]. Each day before the start of cognitive testing, two mealworms were temporarily placed  
146 in both wells of the cognitive task in order to prevent the bird from relying on olfactory cues to choose  
147 the rewarded well during testing. The associative and reversal learning tests followed the protocols



148 used by Shaw et al. [41] and Ashton et al. [5]. One of the two colours was randomly assigned to be the  
149 rewarded colour for each test bird. In each trial, the first peck of the individual when approaching the  
150 task was counted as correct (1 = rewarded lid) or incorrect (0 = unrewarded lid). During the first trial,  
151 the individual was allowed to search both wells to see that only one hid the reward. In the following  
152 trials, if the individual chose correctly, it ate the mealworm and the task was removed to replace it  
153 out of its sight. If the individual chose incorrectly the task was removed before the individual could  
154 peck the other lid and gain the reward. The position of the rewarded well was pseudorandomised  
155 between trials to ensure the individual associated the colour of the lid with the reward, and not the  
156 position of the lid. Associative learning performance was quantified as the number of trials required  
157 to reach the passing criterion, which was six correct choices in a row (a significant deviation from a  
158 random binomial probability: binomial test  $p = 0.016$ ; i.e. the individual has a probability of 1.6% of  
159 achieving six correct choices in a row by random chance). If the bird passed the associative learning  
160 task, the reversal learning task was carried out 24h after. Reversal learning performance was  
161 quantified using exactly the same protocol and passing criterion used for associative learning, but  
162 rewarding the opposite colour.

### 163 *2.2.3 Inhibitory control*

164 We quantified inhibitory control using a detour-reaching task, which consisted of a transparent barrier  
165 (clear smooth PVC, 200  $\mu\text{m}$  thick) fixed onto a wooden base (Figure 1B), with a mealworm positioned  
166  $\sim 2$  cm behind the barrier on the wooden base. The task was presented to the individual straight on so  
167 that the mealworm was visible behind the barrier, but not accessible from the direction that the  
168 individual was approaching the task. In this task, the individual had to inhibit the prepotent response  
169 of pecking the barrier when seeing the food reward and instead detour around the barrier to retrieve  
170 it. A trial was marked as correct if the individual retrieved the mealworm from behind the barrier  
171 without pecking it. The passing criterion was six correct trials in a row and the performance measure  
172 was the number of trials to criterion.

#### 173 2.2.4 Task variants

174 This study was conceived as part of a long-term project that involved repeatedly quantifying individual  
175 cognitive performance (see Supplementary Material section 6). To control for the potentially  
176 confounding effects of memory on cognitive performance, causally identical but visually distinct  
177 variants of each task were used over the course of the project [54]. Different colour combinations  
178 (dark vs light green and purple in 2018; dark vs light green, purple, blue, orange, and pink in 2019 and  
179 2021) and shapes of the transparent barrier (cylinder and wall in 2018; cylinder, wall, arch, umbrella,  
180 and corner in 2019 and 2021; Figure S1) were randomly assigned to each individual tested. The variant  
181 used did not significantly affect the number of trials taken to pass the associative and reversal learning  
182 tasks nor the inhibitory control task, respectively (see Supplementary Material section 2).

#### 183 2.3 Proxies of motivation

184 Performance in cognitive tasks may be influenced by the motivation of the individual to interact with  
185 the task, especially in the wild, where researchers have limited control over environmental and  
186 individual condition [11]. When completing a cognitive task based on a food reward, individual  
187 performance might vary depending on hunger level and amount of food available in the environment.  
188 For this reason, we measured several proxies of motivation: foraging efficiency, body mass, latency to  
189 approach the task, and inter-trial interval.

190 Weekly 20-min behavioural focal observations were carried out for all the individuals tested. Focal  
191 observations were conducted by continuously recording the behaviours of the individual (to the  
192 nearest second) using a customised programme created in the free software Cybertracker. Foraging  
193 efficiency [grams of biomass consumed per foraging minute; following 55] was calculated from focal  
194 observations comprising at least five minutes of foraging. Food items that were provisioned to young  
195 were excluded from the calculation to better approximate individual hunger level. As a previous study  
196 found babblers forage more efficiently in the early morning [56], we paired the timing of the focal  
197 observation and cognitive testing by performing both either in the early morning (before 9 am) or

198 later in the day (after 9 am). As an additional proxy of hunger level, we measured the body mass of  
199 each individual (accuracy 0.1 g) within the four hours prior to each cognitive test by enticing the  
200 individual to jump on a top-pan scale to retrieve a mealworm [57]. Finally, we measured the latency  
201 to approach the task as the time elapsed between the focal individual being within 5 m of the task and  
202 first making contact with the task [5] and the average inter-trial interval (see Supplementary Material  
203 section 4).

#### 204 **2.4 Measures of reproductive success**

205 Since 2003, each year during the breeding season (September-March) researchers perform weekly  
206 visits to the babbler groups during which the number and identity of individuals (adults, fledglings,  
207 juveniles) and any breeding activity are noted [44]. Nests are located by observing nest building, and  
208 accurate hatch and fledge dates are recorded by checking the nests every two-three days once they  
209 have been located. If fledglings are missing after two consecutive visits to the group, they are  
210 considered dead. We assumed only dominant individuals bred [46], therefore the offspring produced  
211 in each breeding attempt were attributed to the dominant male and female in the group at the time  
212 the breeding attempt was recorded. The extensive life history database allowed us to determine the  
213 number of fledglings produced per year, the number of fledglings surviving to independence [i.e. 90  
214 days post-hatching, when offspring receive < 1 feed/hour; 57] per year, and the number of fledglings  
215 recruited into the adult population [i.e. surviving to one year post-hatching; 58] per year for each  
216 dominant individual.

#### 217 **2.5 Statistical analyses**

218 All analyses were performed with R statistical software version 4.2.0 [59]. To investigate the causes  
219 and fitness consequences of variation in cognitive performance, we fitted different sets of Generalized  
220 Linear Mixed Models (GLMMs) using the *lmerTest* package [60] and tested the relative importance of  
221 different candidate explanatory terms by ranking them by Akaike information criterion score  
222 corrected for small sample sizes (AICc). Models within 2  $\Delta$ AICc of the best model and with predictors

223 whose 95% confidence intervals did not intersect zero were included in the top model set, and were  
224 considered to explain variation in the dependent variable better than other candidate models [61].  
225 Continuous predictors were scaled by centring on the mean and dividing by one standard deviation.  
226 Normality of residuals, presence of outliers and dispersion were checked using the *DHARMA* package  
227 [62].

### 228 *2.5.1 Relationships between individual cognitive performances across tasks*

229 First, we tested whether cognitive performance was correlated across tasks by performing Spearman's  
230 rank correlations on the scores (i.e. number of trials to pass) of each pair of tasks. Note that a lower  
231 score in this case indicates fewer trials to pass the task, and hence, better cognitive performance. To  
232 determine whether individual performance in different tasks could be explained by a single factor  
233 (GCP), we then performed an unrotated principal component analysis (PCA) on the scores of the  
234 associative learning, reversal learning and inhibitory control tasks, using the *FactoMineR* package [63].  
235 Following Shaw et al. [41], to test whether the mean and standard deviation of the loadings onto the  
236 first principal component (PC1) deviated from what is expected by chance, we performed 10000 PCA  
237 simulations using the function *randomizeMatrix* in the *picante* package [64]. For each simulation, the  
238 cognitive scores within each task were randomised among individuals and a PCA was performed. We  
239 then compared the real mean and standard deviation of the loadings onto PC1 to the 95% confidence  
240 intervals (CI) of the simulated means and standard deviations of the loadings onto PC1.

### 241 *2.5.2 Factors explaining interindividual variation in cognitive performance*

242 To determine whether individual and group attributes or proxies of motivation explained inter-  
243 individual variation in cognitive performance, we fitted LMMs containing group identity as a random  
244 term and GCP as dependent variable, where GCP was the individual coordinate along PC1 but with the  
245 opposite sign so that higher values corresponded to higher general cognitive performance. We used  
246 GCP as a measure of individual cognitive performance because performance on all tasks loaded  
247 strongly and positively onto PC1 (section 2.5.1). The individual and group attributes considered as

248 candidate explanatory terms were age, sex, rank, and group size. The proxies of motivation tested  
249 were: average latency to approach (s), inter-trial interval (min), body mass (g) and foraging efficiency  
250 (g/min), all of which were averaged across the three tasks used to compute GCP. We also included  
251 testing order within a group to test for any potential effect of social learning (*sensu* Ashton et al.  
252 2018a). If social learning was occurring, we predicted that individuals tested later within a group would  
253 perform better than those tested earlier. Additionally, to test for a potential effect of different activity  
254 levels throughout the day, we included the explanatory term “time of day”, which was calculated as  
255 follows: each task was assigned a 1 if the test started before 9 am or a 0 if the test started later in the  
256 day, then this value was summed for the three tasks, obtaining a value between 0 (all tests started  
257 after 9 am) and 3 (all tests started before 9 am). Finally, we included study year (2018; 2019 or 2021)  
258 as a predictor to check for any differences in overall conditions across years that might have affected  
259 cognitive performance. We also tested all additive models and pairwise interactions among sex, age,  
260 rank, group size, body mass and study year. Individuals of unknown sex (N = 6) were excluded from  
261 this analysis.

### 262 *2.5.3 The relationship between cognitive performance and reproductive success*

263 When analysing reproductive success, we considered only dominant individuals because subordinates  
264 do not have the opportunity to breed [46]. We included two individuals that were subordinates in the  
265 early years of testing but were retested once they gained dominance, for a total of N = 19 dominant  
266 individuals. First, we checked whether the individual attributes that determine variation in cognitive  
267 performance, i.e. age and sex (based on the results of section 2.5.2), were also associated with  
268 variation in the average number of fledglings produced per year since year two of age, which is the  
269 earliest age at which individuals in our dataset bred (see Supplementary Material section 8). Hence,  
270 we determined if individual cognitive performance was directly related to reproductive success. We  
271 considered three measures of reproductive success: number of fledglings produced per year, number  
272 of fledglings that survived to independence per year and number of fledglings that survived to

273 recruitment per year. When there were multiple breeding attempts within a year we used cumulative  
274 numbers, and we assigned a 0 for years in which dominant individuals did not successfully breed. The  
275 average number of years with breeding data per dominant individual tested was 4.7 (range 1-11  
276 years), where a year encompasses the austral breeding season (from September of one year to August  
277 of the next year). For each of the three measures of reproductive success we fitted a set of GLMMs  
278 with a Poisson error distribution and year and individual ID as random terms. Group ID was not  
279 included in these models as a random term because it resulted in overfitting (singular fit). The  
280 candidate explanatory terms tested were GCP, age, sex, group size, and drought (1= drought vs 0 = no  
281 drought occurring during the breeding season). Group size and drought [defined as rainfall  $\leq$  137 mm;  
282 see 65] were included among the explanatory terms because a recent study found they predicted the  
283 number of offspring surviving to independence in babblers [65]. We also tested the interaction  
284 between GCP and sex to determine if the relationship between cognition and reproduction differed  
285 in males and females. To identify the minimum determinable effect of two-way interactions given our  
286 sample sizes [66, 67], we conducted a power analysis with the *pwr* package [68].

### 287 **3. RESULTS**

#### 288 **3.1 Relationships between individual cognitive performance across tasks**

289 The 38 tested babblers completed the associative learning, reversal learning and inhibitory control  
290 tasks in a mean of 39.26 trials (range 6-120), 63.18 trials (range 6-120) and 34.58 trials (range 6-105)  
291 respectively; the range indicating great variation in cognitive performance. We found positive  
292 correlations in cognitive performance for all pairwise comparisons across tasks, but only the  
293 correlation between associative and reversal learning performance was significant (associative and  
294 reversal learning: Spearman's  $\rho = 0.65$ ,  $p < 0.001$ ; reversal learning and inhibitory control:  
295 Spearman's  $\rho = 0.29$ ,  $p = 0.08$ ; associative learning and inhibitory control: Spearman's  $\rho = 0.14$ ,  $p$   
296  $= 0.42$ ). The consistent positive direction of pairwise correlations between tasks aligns with the output  
297 of the PCA, which showed that all cognitive scores loaded positively onto PC1 extracted with an

298 eigenvalue over one (Table 1). PC1 explained 59.5 % of the total variation in cognitive performance  
299 across tasks (Table 1).

300 The PCA results were highly unlikely to occur by chance because the real mean loading onto PC1 was  
301 higher than the 95% CI of the randomly simulated mean loadings (95% CI of simulated means for PC1  
302 = 0.01-0.67, real mean = 0.76; Figure S3), and while the real SD was within the 95% CI of the simulated  
303 SD, it was at the lower end of the distribution (95% CI of simulated SD for PC1 = 0.08-0.83, real SD =  
304 0.16; Figure S3). In other words, of the 10000 random simulations, only 0.03% had a larger mean  
305 loading on PC1 and only 8.07% had a smaller SD. Additionally, when we examined the cognitive scores  
306 of 18 individuals that were tested twice on the cognitive test battery during the study years (2018-  
307 2021), individual scores from the second replicate of the cognitive test battery also loaded positively  
308 onto PC1, which explained 46.3% of the total variance in cognitive performance, providing further  
309 evidence for general cognitive performance (GCP); importantly, GCP was significantly repeatable ( $R =$   
310  $0.50$ ;  $SE = 0.18$ ;  $95\% \text{ CI} = 0.09; 0.78$ ;  $p = 0.015$ ) (see Supplementary Material section 6).

### 311 **3.2 Factors explaining interindividual variation in cognitive performance**

312 The factors that best explained variation in GCP were age and sex (Table 2). GCP declined with age in  
313 females but not males (females: coefficient  $\pm SE = -0.77 \pm 0.20$ ,  $95\% \text{ CI} = -1.18; -0.37$ , males: coefficient  
314  $\pm SE = 0.13 \pm 0.24$ ,  $95\% \text{ CI} = -0.36; 0.62$ ;  $N = 32$ , of which 16 females and 16 males; see Figure 2). Group  
315 size was not a significant predictor of general cognitive performance (see Supplementary Material  
316 section 9 for a discussion of this result). Importantly, study year and the proxies of motivation  
317 examined (i.e. latency to approach the task, inter-trial interval, body mass, foraging efficiency, time of  
318 day) did not significantly explain variation in GCP (Supplementary Material Table S3).

### 319 **3.3 The relationship between general cognitive performance and reproductive success**

320 The average number of fledglings produced per year since age two tended to increase with age in  
321 females but not in males (Supplementary Material section 8). Hence, in females, the relationship

322 between reproductive success and age followed an opposite trend compared to the relationship  
323 between GCP and age: older females tended to produce more fledglings per year on average but  
324 showed lower general cognitive performance. In line with this result, we found that individual general  
325 cognitive performance was negatively related with the number of fledglings produced per year (Table  
326 3A, Figure 3). We did not find evidence that this relationship differed in males and females (non-  
327 significant interaction GCP  $\times$  sex), but we only had power to detect very large effects of two-way  
328 interactions (Cohen's  $f^2 = 0.51$ ).

329 The main predictor of the number of fledglings surviving to independence was the occurrence of  
330 droughts, with more fledglings reaching nutritional independence in non-drought years (Table 3B).  
331 None of the explanatory terms tested were a significant predictor of the number of fledglings surviving  
332 to recruitment (Table 3C). However, we had to exclude the two dominant females who showed the  
333 highest GCP from the latter analysis due to missing data on the number of fledglings surviving to  
334 recruitment, therefore the lack of an effect of GCP on the number of offspring recruited per year  
335 should be interpreted with caution.

#### 336 **4. DISCUSSION**

337 We quantified individual cognitive performance in a wild bird population with the aim to answer three  
338 central questions in cognitive ecology: (a) does performance co-vary across cognitive tasks, (b) what  
339 drives these individual differences, and (c) is individual cognitive performance related to reproductive  
340 success. We found that most of the variation in individual cognitive performance across tasks could  
341 be explained by a single factor (GCP or general cognitive performance). Individual differences in GCP  
342 depended on age and sex. Older females (but not males) showed lower GCP and tended to produce  
343 more fledglings per year on average. Accordingly, we found that GCP was negatively related to the  
344 number of fledglings produced per year. These findings support the existence of general cognitive  
345 processes in wild babblers and suggest that individuals might trade off the resources invested in  
346 reproduction against cognitive performance.



#### 347 **4.1 Is there evidence for a general cognitive factor in wild babblers?**

348 Individuals that learnt an association faster, were also faster at reversing the learnt association and  
349 showed better inhibitory control, as indicated by positive (albeit not always significant) correlations in  
350 cognitive performance across tasks. Indeed, approximately 60% of the variance in individual cognitive  
351 performance across tasks could be explained by a single factor: GCP. Additionally, GCP was  
352 significantly repeatable ( $R = 0.50$ ), indicating that our measure of general cognitive performance  
353 captured consistent inter-individual differences in cognition. While we cannot completely exclude that  
354 motivation to interact with the cognitive tasks affected cognitive performance, we are confident that  
355 its effect on our measure of GCP was minimal because none of the measured proxies of motivation,  
356 such as average latency to approach the task or inter-trial interval, significantly explained variation in  
357 GCP. It is also worth noting that all the tested birds interacted with the tasks and always ate the food,  
358 further indicating that the birds were motivated to interact with the tasks. Therefore, our findings are  
359 consistent with the existence of a general cognitive factor underpinning performance across different  
360 cognitive domains in babblers. However, our test battery included only three cognitive tasks, which is  
361 the minimum number required to test for a general cognitive factor [35]. Therefore, future studies  
362 should consider expanding the test battery by including, for example, spatial memory tasks redesigned  
363 so that there is scope to quantify spatial memory [e.g. adding a presentation at 72h or changing the  
364 scale of the spatial task; 41], and tasks assessing social cognition, the ability to make inferences, and  
365 reaction time [37, 41].

366 Alternative explanations for the single factor GCP underpinning individual cognitive performance  
367 across tasks are also possible. First, the different tasks used may tap into the same cognitive process.  
368 For example, it has been suggested that associative learning may underlie variation in performance in  
369 animal test batteries [40]. Second, positive correlations between tasks could be the consequence of  
370 underlying variation in individual phenotypic or genetic quality; for example, a single genetically-  
371 determined component of the nervous system may determine differences in neuronal function that

372 affect all cognitive domains simultaneously [69]. Therefore, whether statistical evidence for GCP  
373 indicates a truly general cognitive ability underlying performance across different cognitive domains  
374 remains to be determined.

#### 375 **4.2 Age-related cognitive decline and individual reproductive success**

376 In babblers, individual variation in general cognitive performance was predicted by an interaction  
377 between age and sex, with cognitive performance declining with age in females but not in males.  
378 Faster cognitive ageing in females has been previously reported in humans [70], nematodes  
379 (*Caenorhabditis remanei*) [71], mice (*Mus musculus*) [72], and captive marmosets (*Callithrix jacchus*)  
380 [25]. However, the only study testing for cognitive senescence in the wild found no decline in spatial  
381 memory performance in mountain chickadees (*Poecile gambeli*) from one to six years of age [26].  
382 Hence, to our knowledge, our finding represents the first evidence of sex differences in age-related  
383 cognitive decline in a wild animal.

384 Senescence has been explained by two main evolutionary theories [reviewed in 28]. The “selection  
385 shadow” theory states that selection strength decreases with age after sexual maturity [73]. Our data  
386 do not support this theory because babblers were still breeding up to 13 years of age, leaving ample  
387 opportunity for selection to act on cognitive traits among older individuals. A second theory is the life  
388 history theory of ageing, which encompasses two convergent theories: the first states that due to the  
389 limited resources available to organisms, these must be traded-off between reproduction and somatic  
390 maintenance (“disposable soma theory”) [74]; the second states that alleles with beneficial effects  
391 early in life but detrimental effects later in life can be favoured by selection (“antagonistic pleiotropy”)  
392 [75]. Based on these theories we would expect that in babblers (1) cognitive performance in older  
393 females is traded-off against increased reproductive output, and/or that (2) females have been  
394 selected for higher cognitive performance early in life even at the expenses of reduced cognitive  
395 performance later in life.

396 Previous studies on babbler life history [51, 76] provide some support for both explanation (1) and (2),  
397 which are not mutually exclusive. First, female babblers (but not males) engage in costly breeding  
398 competition [76, 77]. Subordinate females compete both indirectly, by courting and nest-building with  
399 unrelated dominant males, and directly, by destroying the eggs of the dominant female [76]. This  
400 competition forces dominant (and older) females to engage in frequent aggressive displays towards  
401 subordinate (and younger) females and repeatedly abandon breeding attempts and re-lay clutches  
402 [76], which entails an additional energetic cost [78]. Hence, in older (dominant) females the cost of  
403 maintaining a high reproductive output, even in the presence of competitors, might be traded-off  
404 against the maintenance of the energetically costly nervous system [13]. For example, previous  
405 experiments in the fruit fly and the cabbage white butterfly (*Pieris rapae*) have revealed a trade-off  
406 between learning performance and competitive ability [79] or female fecundity [80], respectively. In  
407 line with this explanation, when analysing long-term reproductive success in dominant babblers, we  
408 found that higher cognitive performance was associated with a lower number of fledglings produced  
409 per year. However, a larger sample size will be necessary to test whether this negative relationship  
410 between cognition and reproduction differs between males and females.

411 The second explanation (i.e. selection for higher female cognitive performance earlier in life) is partly  
412 supported by sex differences in babbler dispersal strategies. Females are more likely than males to  
413 gain a breeding position by overthrowing a dominant female in a non-natal group [51, 81].  
414 Accordingly, juvenile females are more aggressive than males, and higher female aggressiveness is  
415 associated with younger age at dispersal [82]. On the contrary, males are more sedentary [83] and  
416 disperse only when search costs are low [84]. It is possible that these sex differences lead to selection  
417 on females for higher cognitive performance early in life, even at the expenses of faster cognitive  
418 senescence. Indeed, cognitive performance in young females might be crucial to gain access to  
419 breeding positions by enabling them to navigate across territories, identify the sex and rank of  
420 conspecifics in non-natal groups, and decide when to engage in aggressive displays towards a  
421 dominant female [85]. Additionally, in babblers the number of immigrant competitors decreases with

422 pair bond tenure, while reproductive success increases [48]. This suggests that on average the risk of  
423 losing a breeding position and thus, potentially, the need to maintain high cognitive performance  
424 might decrease with female age. Overall, our findings paired with evidence from previous research in  
425 babblers suggest that females may be under selection for higher cognitive performance earlier in life  
426 despite faster cognitive senescence and/or cognitive senescence may be accelerated by investment  
427 in reproduction and breeding competition. However, longitudinal studies are ultimately needed to  
428 describe cognitive ageing trajectories and test these hypotheses.

429 Since we used a cross-sectional design instead of a longitudinal design, we cannot determine whether  
430 cognitive performance declined throughout life in females, or whether only females with lower  
431 cognitive performance survived until old ages. Therefore, a third potential explanation for the  
432 observed sex differences in age-related cognitive decline is that cognitive performance is negatively  
433 linked to survival, at least in females. For example in pheasants (*Phasianus colchicus*), survival in the  
434 wild was negatively related to reversal learning performance [86]. As most of the birds tested in the  
435 present study are still alive to date, we could not perform a survival analysis to examine potential  
436 effects of individual cognitive performance on survival, but this will be a necessary next step to confirm  
437 whether the findings from the present study are due to cognitive senescence or reduced survival of  
438 smarter females.

### 439 **4.3 A negative relationship between cognitive performance and reproductive success**

440 We found that individuals with better general cognitive performance produced fewer fledglings per  
441 year, which is consistent with a trade-off between cognition and reproduction. However, GCP did not  
442 predict the number of fledglings surviving to nutritional independence, which depended instead on  
443 the occurrence of droughts during the breeding season, in line with a previous study [65]. It is possible  
444 that parental traits influence offspring survival in the nestling stage but not in the post-fledgling stage,  
445 where survival may be more strongly influenced by environmental conditions [87]. Therefore, the  
446 extent to which cognitive performance may be under negative selection remains to be determined.

447 Cognitive performance might also be simultaneously associated with life-history traits linked to fitness  
448 in different directions [88, 89]. For example, while cognitive performance is negatively related to the  
449 number of fledglings produced per year by dominant individuals, it might be positively related to the  
450 age at which dominance is acquired in the first place. Future comparisons of the age at acquisition of  
451 dominance among individuals whose cognition was tested as subordinates will allow us to address  
452 this hypothesis.

#### 453 **4.4 Conclusion**

454 We found that individual cognitive performance covaried across tasks, which is consistent with a  
455 general cognitive factor, though alternative explanations cannot be excluded. We considered the  
456 effect of individual and social attributes and several proxies of motivation on cognitive performance.  
457 We found that general cognitive performance depended on sex and age, declining with age in females  
458 but not males. Older females also tended to fledge more nestlings per year. By analysing over 10 years  
459 of breeding data, we show that individuals with lower general cognitive performance produced more  
460 fledglings per year. Our findings suggest that cognitive performance is traded-off against  
461 reproduction, demonstrating that in order to understand how selection acts on cognition we need to  
462 consider not only its benefits but also its costs.

#### 463 **Acknowledgements**

464 We thank the managers at the Kuruman River Reserve (KRR) and the families at the surrounding farms  
465 (Van Zylsrus, South Africa) for making this work possible. We thank Amanda Bourne, Lina Peña-  
466 Ramirez, Grace Blackburn, Amy Hunter, and Samantha Wagstaff for assistance during data collection.  
467 We are grateful to the Hot Birds Research Project for access to the KRR rainfall data and to Amanda  
468 Bourne for calculation of drought/non-drought years. We thank the FitzPatrick Institute of African  
469 Ornithology for ongoing logistical support. We also thank Prof Leigh Simmons for the advice given to  
470 Camilla Soravia as part of her supervisory team.

471 **Funding**

472 This work was funded by the Australian Government Research Training Program through a scholarship  
473 awarded to Camilla Soravia at The University of Western Australia and by the Australian Research  
474 Council through a Discovery Project grant (No. DP220103823) awarded to Amanda Ridley, Benjamin  
475 Ashton, and Alex Thornton. The KRR, the study site where this research was based, was financed by  
476 the Universities of Cambridge and Zurich, the MAVA Foundation and the European Research Council  
477 (grant no. 294494 to Tim Clutton-Brock) and received logistical support from the Mammal Research  
478 Institute of the University of Pretoria.

479 **Ethics statement**

480 This research was approved by the Animal Ethics Committee, University of Western Australia  
481 (RA/3/100/1619 and 2021/ET000414).

482 **Tables**

483 **Table 1.** Output of the principal component analysis on the scores (i.e. number of trials to pass)  
484 obtained by 38 pied babblers on three cognitive tasks quantifying associative learning, reversal  
485 learning and inhibitory control.

| Cognitive task       | PC1   |
|----------------------|-------|
| Associative learning | 0.82  |
| Reversal learning    | 0.88  |
| Inhibitory control   | 0.58  |
| Eigenvalue           | 1.79  |
| % Variance explained | 59.54 |

486

487 **Table 2.** Top model set of candidate terms affecting general cognitive performance in pied babblers.  
488 All models included group ID as a random term. Corrected Akaike information criterion (AICc) and  
489  $\Delta$ AICc are provided for models within 2  $\Delta$ AICc of the top model and with predictors whose 95%  
490 confidence intervals (CI) do not intersect zero. Coefficient estimates  $\pm$  standard errors (SE) and 95% CI  
491 are given below the top model set. N = 32 individuals from 11 groups. See Supplementary Material,  
492 Table S3 for full model selection outputs.

| Top model set                    | AICc              | $\Delta$ AICc |
|----------------------------------|-------------------|---------------|
| Age $\times$ Sex                 | 103.53            | 0.00          |
| <i>Basic</i>                     | <i>109.46</i>     | <i>5.93</i>   |
| Effect size of explanatory terms | Estimate $\pm$ SE | 95% CI        |
| Age                              | -0.76 $\pm$ 0.19  | -1.14; -0.37  |
| Sex (male)                       | -0.48 $\pm$ 0.28  | -1.05; 0.09   |
| Age $\times$ Sex (male)          | 0.90 $\pm$ 0.29   | 0.29; 1.49    |

493



494 **Table 3.** Model set of candidate terms affecting three measures of reproductive success in pied  
 495 babblers. The models included year and individual ID as random terms. Corrected Akaike information  
 496 criterion (AICc) and  $\Delta$ AICc are provided for candidate explanatory terms. Coefficient estimates  $\pm$   
 497 standard errors (SE) and 95% confidence intervals (CI) are given below the model sets for models  
 498 within 2  $\Delta$ AICc of the top model and with predictors whose 95% confidence intervals (CI) do not  
 499 intersect zero. The measures of reproductive success examined were (A) number of fledglings  
 500 produced per year, N = 90 observations for 19 dominant individuals over 14 years; (B) number of  
 501 fledglings reaching independence per year, N = 81 observations for 18 dominant individuals over 14  
 502 years; (C) number of fledglings recruited per year, N = 79 observations for 14 dominant individuals  
 503 over 13 years.

| Model selection                             | AICc              | $\Delta$ AICc |
|---------------------------------------------|-------------------|---------------|
| A) Number of fledglings per year            |                   |               |
| General cognitive performance               | 356.08            | 0.00          |
| General cognitive performance $\times$ Sex* | 357.38            | 1.30          |
| Sex*                                        | 357.46            | 1.38          |
| Age                                         | 358.76            | 2.68          |
| <i>Basic</i>                                | 359.01            | 2.93          |
| Drought                                     | 359.75            | 3.67          |
| Group size                                  | 361.17            | 5.09          |
| B) Number of independent offspring per year |                   |               |
| Drought                                     | 258.70            | 0.00          |
| <i>Basic</i>                                | 264.59            | 5.89          |
| Sex                                         | 264.80            | 6.10          |
| Age                                         | 266.09            | 7.39          |
| General cognitive performance               | 266.26            | 7.56          |
| Group size                                  | 266.56            | 7.86          |
| General cognitive performance $\times$ Sex  | 269.21            | 10.51         |
| C) Number of offspring recruited per year   |                   |               |
| Drought                                     | 204.48            | 0.00          |
| <i>Basic</i>                                | 205.73            | 1.25          |
| Age                                         | 205.77            | 1.29          |
| Sex                                         | 206.05            | 1.57          |
| General cognitive performance               | 206.74            | 2.26          |
| Group size                                  | 207.80            | 3.32          |
| General cognitive performance $\times$ Sex  | 209.27            | 4.79          |
| Effect size of explanatory terms            | Estimate $\pm$ SE | 95% CI        |
| A) Number of fledglings per year            |                   |               |
| General cognitive performance               | -0.18 $\pm$ 0.07  | -0.34; -0.03  |
| B) Number of independent offspring per year |                   |               |
| Drought                                     | -0.99 $\pm$ 0.34  | -1.82; -0.36  |

504 \* Not included in the top model set because 95% CI intersect zero

505 **Figures**

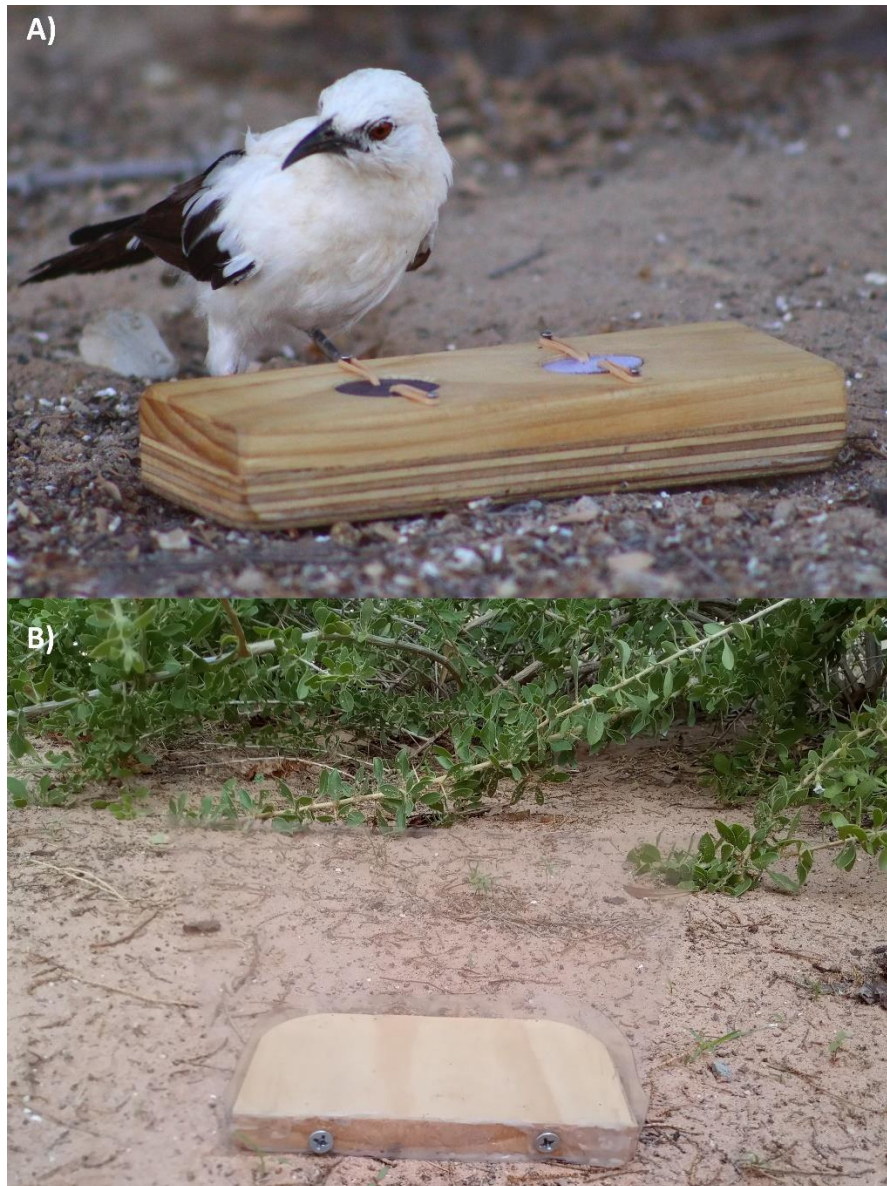

506

507 **Figure 1.** Wild pied babbler interacting with the cognitive task used to quantify associative and reversal  
508 learning (A); and example of task used to quantify inhibitory control (B). In A) the individual has to  
509 learn the association between a colour cue (dark versus light purple lids in the picture) and a food  
510 reward (mealworm inside the well). In B) a mealworm is placed behind the transparent barrier and  
511 the individual has to inhibit the prepotent instinct of pecking the barrier when seeing the food reward  
512 behind it and instead detour around it. Photo credits: Nicholas Pattinson.

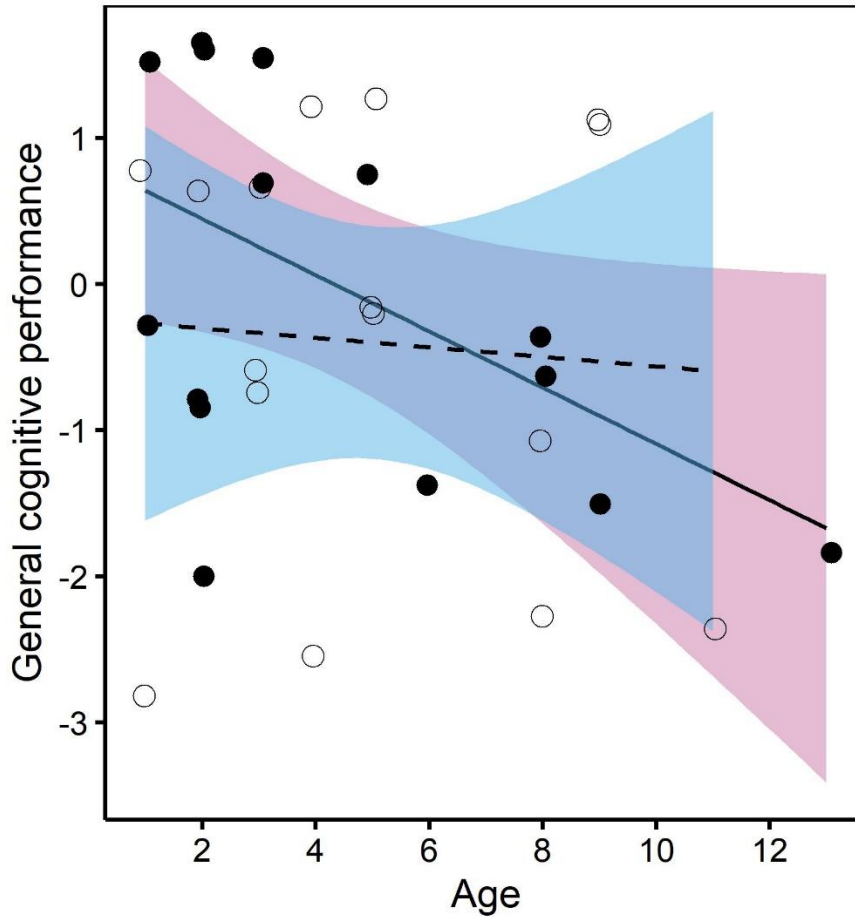

513

514 **Figure 2.** Variation in pied babblers' general cognitive performance by age and sex (females: pink  
515 colour, solid line, filled dots; males: blue colour, dashed line, empty dots). General cognitive  
516 performance declined with age in females but not in males (N = 16 females and 16 males). Points are  
517 raw data; fitted lines and 95% confidence interval bands are generated from the output of the model  
518 presented in Table 2.

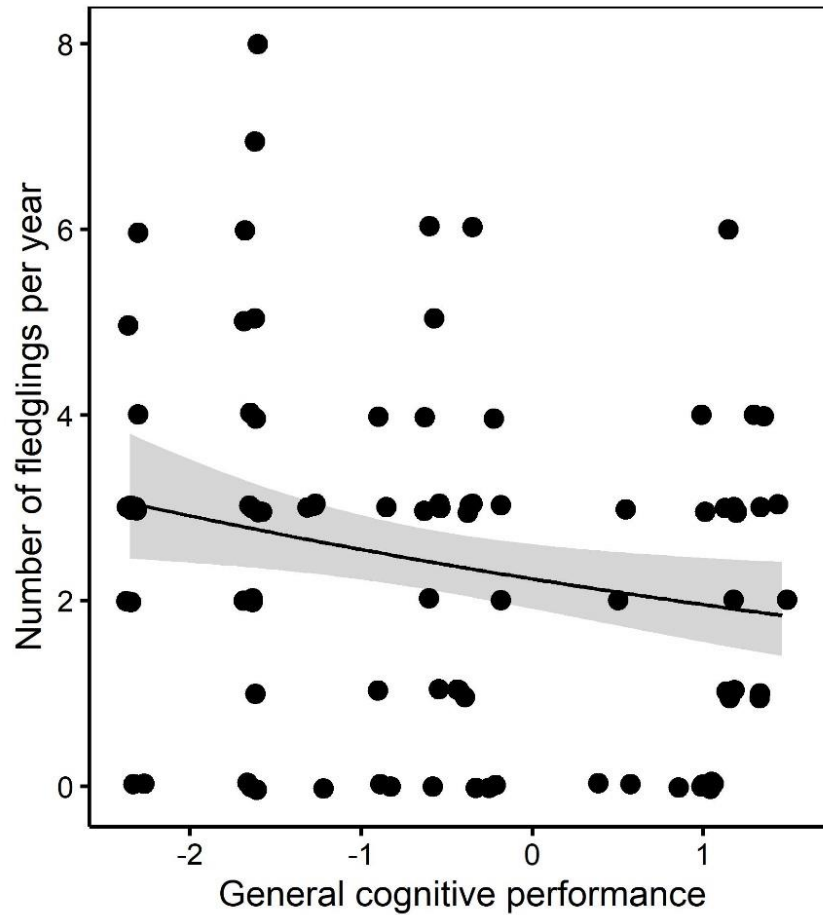

519

520 **Figure 3.** The relationship between the number of fledglings produced per year and general cognitive  
521 performance in dominant pied babblers (N = 90 observations for 19 dominant individuals over 14  
522 years). Individuals showing higher general cognitive performance produced fewer fledglings per year.  
523 Points are raw data; the fitted line and 95% confidence interval band are generated from the output  
524 of the model presented in Table 3.

## 525 References

- 526 1 Shettleworth, S. J. 2010 *Cognition, evolution, and behavior*. Oxford: Oxford University Press.
- 527 2 Szabo, B., Valencia-Aguilar, A., Damas-Moreira, I., Ringler, E. 2022 Wild cognition—linking form and
- 528 function of cognitive abilities within a natural context. *Curr. Opin. Behav. Sci.* **44**, 101115.
- 529 3 Bond, A. B., Kamil, A. C., Balda, R. P. 2007 Serial reversal learning and the evolution of behavioral
- 530 flexibility in three species of North American corvids (*Gymnorhinus cyanocephalus*, *Nucifraga*
- 531 *columbiana*, *Aphelocoma californica*). *J. Comp. Psychol.* **121**, 372-379.
- 532 4 MacLean, E. L., Hare, B., Nunn, C. L., Addessi, E., Amici, F., Anderson, R. C., Aureli, F., Baker, J. M.,
- 533 Bania, A. E., Barnard, A. M. 2014 The evolution of self-control. *PNAS.* **111**, E2140-E2148.
- 534 5 Ashton, B. J., Ridley, A. R., Edwards, E. K., Thornton, A. 2018 Cognitive performance is linked to group
- 535 size and affects fitness in Australian magpies. *Nature.* **554**, 364-367.
- 536 6 Branch, C. L., Pitera, A. M., Kozlovsky, D. Y., Bridge, E. S., Pravosudov, V. V. 2019 Smart is the new
- 537 sexy: female mountain chickadees increase reproductive investment when mated to males with better
- 538 spatial cognition. *Ecol. Lett.* **22**, 897–903.
- 539 7 Croston, R., Branch, C. L., Kozlovsky, D. Y., Dukas, R., Pravosudov, V. V. 2015 Heritability and the
- 540 evolution of cognitive traits. *Behav. Ecol.* **26**, 1447-1459.
- 541 8 Chen, J., Zou, Y., Sun, Y.-H., ten Cate, C. 2019 Problem-solving males become more attractive to
- 542 female budgerigars. *Science.* **363**, 166-167.
- 543 9 Shaw, R. C., MacKinlay, R. D., Clayton, N. S., Burns, K. C. 2019 Memory performance influences male
- 544 reproductive success in a wild bird. *Curr. Biol.* **29**, 1498-1502
- 545 10 Sonnenberg, B. R., Branch, C. L., Pitera, A. M., Bridge, E., Pravosudov, V. V. 2019 Natural selection
- 546 and spatial cognition in wild food-caching mountain chickadees. *Curr. Biol.* **29**, 670-676. e673.
- 547 11 Boogert, N. J., Madden, J. R., Morand-Ferron, J., Thornton, A. 2018 Measuring and understanding
- 548 individual differences in cognition. *Philos. Trans. R. Soc. Lond., B, Biol. Sci.* **373**, 20170280.
- 549 12 Burger, J. M., Kolss, M., Pont, J., Kawecki, T. J. 2008 Learning ability and longevity: a symmetrical
- 550 evolutionary trade-off in *Drosophila*. *Evolution.* **62**, 1294-1304.
- 551 13 Heldstab, S. A., Isler, K., Graber, S. M., Schuppli, C., van Schaik, C. P. 2022 The economics of brain
- 552 size evolution in vertebrates. *Curr. Biol.* **32**, R697-R708.
- 553 14 Ashton, B. J., Thornton, A., Ridley, A. R. 2018 An intraspecific appraisal of the social intelligence
- 554 hypothesis. *Philos. Trans. R. Soc. Lond., B, Biol. Sci.* **373**, 20170288.
- 555 15 Pravosudov, V. V., Roth II, T. C., LaDage, L. D., Freas, C. A. 2015 Environmental influences on spatial
- 556 memory and the hippocampus in food-caching chickadees. *Comp. Cogn. Behav.* **10**,
- 557 16 Coppola, V. J., Hough, G., Bingman, V. P. 2014 Age-related spatial working memory deficits in
- 558 homing pigeons (*Columba livia*). *Behav. Neurosci.* **128**, 666.
- 559 17 Boogert, N. J., Reader, S. M., Laland, K. N. 2006 The relation between social rank, neophobia and
- 560 individual learning in starlings. *Anim. Behav.* **72**, 1229-1239.
- 561 18 Lucon-Xiccato, T., Bisazza, A. 2017 Sex differences in spatial abilities and cognitive flexibility in the
- 562 guppy. *Anim. Behav.* **123**, 53-60.
- 563 19 Jones, C. M., Braithwaite, V. A., Healy, S. D. 2003 The evolution of sex differences in spatial ability.
- 564 *Behav. Neurosci.* **117**, 403-411.
- 565 20 Keagy, J., Minter, R., Tinghitella, R. M. 2019 Sex differences in cognition and their relationship to
- 566 male mate choice. *Curr. Zool.* **65**, 285-293.
- 567 21 Guigueno, M. F., Snow, D. A., MacDougall-Shackleton, S. A., Sherry, D. F. 2014 Female cowbirds
- 568 have more accurate spatial memory than males. *Biol. Lett.* **10**, 20140026.
- 569 (doi:10.1098/rsbl.2014.0026)
- 570 22 Franks, V. R., Thorogood, R. 2018 Older and wiser? Age differences in foraging and learning by an
- 571 endangered passerine. *Behav. Processes.* **148**, 1-9.
- 572 23 Mirville, M. O., Kelley, J. L., Ridley, A. R. 2016 Group size and associative learning in the Australian
- 573 magpie (*Cracticus tibicen dorsalis*). *Behav. Ecol. Sociobiol.* **70**, 417-427.
- 574 24 Yu, L., Tucci, V., Kishi, S., Zhdanova, I. V. 2006 Cognitive aging in zebrafish. *PLoS one.* **1**, e14.

- 575 25 Rothwell, E. S., Workman, K. P., Wang, D., Lacreuse, A. 2022 Sex differences in cognitive aging: a 4-  
576 year longitudinal study in marmosets. *Neurobiol. Aging*. **109**, 88-99.
- 577 26 Heinen, V. K., Pitera, A. M., Sonnenberg, B. R., Benedict, L. M., Branch, C. L., Bridge, E. S.,  
578 Pravosudov, V. V. 2021 Specialized spatial cognition is associated with reduced cognitive senescence  
579 in a food-caching bird. *Proc. R. Soc. B: Biol. Sci.* **288**, 20203180.
- 580 27 Forster, M. J., Dubey, A., Dawson, K. M., Stutts, W. A., Lal, H., Sohal, R. S. 1996 Age-related losses  
581 of cognitive function and motor skills in mice are associated with oxidative protein damage in the  
582 brain. *PNAS*. **93**, 4765-4769.
- 583 28 Nussey, D. H., Froy, H., Lemaitre, J.-F., Gaillard, J.-M., Austad, S. N. 2013 Senescence in natural  
584 populations of animals: widespread evidence and its implications for bio-gerontology. *Ageing Res. Rev.*  
585 **12**, 214-225.
- 586 29 Rowe, C., Healy, S. D. 2014 Measuring variation in cognition. *Behav. Ecol.* **25**, 1287-1292.
- 587 30 Dehnen, T., Arbon, J. J., Farine, D. R., Boogert, N. J. 2022 How feedback and feed-forward  
588 mechanisms link determinants of social dominance. *Biol. Rev.* **97**, 1210-1230.
- 589 31 Barnard, C., Luo, N. 2002 Acquisition of dominance status affects maze learning in mice. *Behav.*  
590 *Processes*. **60**, 53-59.
- 591 32 Thornton, A., Samson, J. 2012 Innovative problem solving in wild meerkats. *Anim. Behav.* **83**, 1459-  
592 1468.
- 593 33 Keynan, O., Ridley, A. R., Lotem, A. 2016 Task-dependent differences in learning by subordinate  
594 and dominant wild Arabian babblers. *Ethology*. **122**, 399-410.
- 595 34 Keynan, O., Ridley, A. R., Lotem, A. 2014 Social foraging strategies and acquisition of novel foraging  
596 skills in cooperatively breeding Arabian babblers. *Behav. Ecol.* **26**, 207-214.
- 597 35 Burkart, J. M., Schubiger, M. N., van Schaik, C. P. 2017 The evolution of general intelligence. *Behav.*  
598 *Brain Res.* **40**, e195.
- 599 36 Deary, I. J., Penke, L., Johnson, W. 2010 The neuroscience of human intelligence differences. *Nature*  
600 *reviews neuroscience*. **11**, 201-211.
- 601 37 Flaim, M., Blaisdell, A. P. 2020 The comparative analysis of intelligence. *Psychol. Bull.* **146**, 1174.
- 602 38 Shaw, R. C., Schmelz, M. 2017 Cognitive test batteries in animal cognition research: evaluating the  
603 past, present and future of comparative psychometrics. *Anim. Cogn.* **20**, 1003-1018.
- 604 39 van Horik, J. O., Langley, E. J., Whiteside, M. A., Laker, P. R., Madden, J. R. 2018 Intra-individual  
605 variation in performance on novel variants of similar tasks influences single factor explanations of  
606 general cognitive processes. *R. Soc. Open Sci.* **5**, 171919.
- 607 40 van Horik, J. O., Lea, S. E. G. 2017 Disentangling learning from knowing: Does associative learning  
608 ability underlie performances on cognitive test batteries? *Behav. Brain Res.* **40**, e220.
- 609 41 Shaw, R. C., Boogert, N. J., Clayton, N. S., Burns, K. C. 2015 Wild psychometrics: evidence for  
610 'general' cognitive performance in wild New Zealand robins, *Petroica longipes*. *Anim. Behav.* **109**, 101-  
611 111.
- 612 42 Morand-Ferron, J., Cole, E. F., Quinn, J. L. 2016 Studying the evolutionary ecology of cognition in  
613 the wild: a review of practical and conceptual challenges. *Biol. Rev.* **91**, 367-389.
- 614 43 Kabadayi, C., Bobrowicz, K., Osvath, M. 2018 The detour paradigm in animal cognition. *Anim. Cogn.*  
615 **21**, 21-35.
- 616 44 Ridley, A., Van den Heuvel, I. 2012 Is there a difference in reproductive performance between  
617 cooperative and non-cooperative species? A southern African comparison. *Behaviour*. **149**, 821-848.
- 618 45 Ridley, A. R. 2016 Southern pied babblers: the dynamics of conflict and cooperation in a group-  
619 living society. In *Cooperative breeding in vertebrates: Studies of ecology, evolution and behavior*.  
620 (ed. ^eds. pp. 115-132. Cambridge: Cambridge University Press.
- 621 46 Nelson-Flower, M. J., Hockey, P. A., O'Ryan, C., Raihani, N. J., Du Plessis, M. A., Ridley, A. R. 2011  
622 Monogamous dominant pairs monopolize reproduction in the cooperatively breeding pied babbler.  
623 *Behav. Ecol.* **22**, 559-565.

- 624 47 Nelson-Flower, M. J., Flower, T. P., Ridley, A. R. 2018 Sex differences in the drivers of reproductive  
625 skew in a cooperative breeder. *Mol. Ecol.* **27**, 2435-2446.
- 626 48 Wiley, E. M., Ridley, A. R. 2018 The benefits of pair bond tenure in the cooperatively breeding pied  
627 babbler (*Turdoides bicolor*). *Ecol. Evol.* **8**, 7178-7185.
- 628 49 Humphries, D. J., Nelson-Flower, M. J., Bell, M. B., Finch, F. M., Ridley, A. R. 2021 Kinship, dear  
629 enemies, and costly combat: The effects of relatedness on territorial overlap and aggression in a  
630 cooperative breeder. *Ecol. Evol.* **11**, 17031-17042.
- 631 50 Bourne, A. R., Cunningham, S. J., Nupen, L. J., McKechnie, A. E., Ridley, A. R. 2021 No sex-specific  
632 differences in the influence of high air temperatures during early development on nestling mass and  
633 fledgling survival in the Southern Pied Babbler (*Turdoides bicolor*). *Ibis.* **164** 304-312.
- 634 51 Raihani, N. J., Nelson-Flower, M. J., Golabek, K. A., Ridley, A. R. 2010 Routes to breeding in  
635 cooperatively breeding pied babblers *Turdoides bicolor*. *Journal of Avian Biology.* **41**, 681-686.
- 636 52 Soravia, C., Ashton, B. J., Thornton, A., Ridley, A. R. 2021 The impacts of heat stress on animal  
637 cognition: implications for adaptation to a changing climate. *Wiley Interdisciplinary Reviews: Climate*  
638 *Change.* **12**, e713.
- 639 53 Hollén, L., Bell, M., Wade, H., Rose, R., Russell, A., Niven, F., Ridley, A., Radford, A. 2011 Ecological  
640 conditions influence sentinel decisions. *Anim. Behav.* **82**, 1435-1441.
- 641 54 Ashton, B. J., Thornton, A., Cauchoix, M., Ridley, A. R. 2022 Long-term repeatability of cognitive  
642 performance. *R. Soc. Open Sci.* **9**, 220069.
- 643 55 Raihani, N. J., Ridley, A. R. 2007 Adult vocalizations during provisioning: offspring response and  
644 postfledging benefits in wild pied babblers. *Anim. Behav.* **74**, 1303-1309.
- 645 56 du Plessis, K. L., Martin, R. O., Hockey, P. A., Cunningham, S. J., Ridley, A. R. 2012 The costs of  
646 keeping cool in a warming world: implications of high temperatures for foraging, thermoregulation  
647 and body condition of an arid-zone bird. *Glob. Change Biol.* **18**, 3063-3070.
- 648 57 Ridley, A. R., Raihani, N. J. 2007 Variable postfledging care in a cooperative bird: causes and  
649 consequences. *Behavioral Ecology.* **18**, 994-1000.
- 650 58 Bourne, A. R., Cunningham, S. J., Spottiswoode, C. N., Ridley, A. R. 2020 Hot droughts compromise  
651 interannual survival across all group sizes in a cooperatively breeding bird. *Ecol. Lett.* **23**, 1776-1788.
- 652 59 R Core Team. R: A Language and Environment for Statistical Computing. 2021 [cited; Available  
653 from: <https://www.R-project.org/>
- 654 60 Kuznetsova, A., Brockhoff, P. B., Christensen, R. H. 2017 lmerTest package: tests in linear mixed  
655 effects models. *J. Stat. Softw.* **82**, 1-26.
- 656 61 Symonds, M. R., Moussalli, A. 2011 A brief guide to model selection, multimodel inference and  
657 model averaging in behavioural ecology using Akaike's information criterion. *Behav. Ecol. Sociobiol.*  
658 **65**, 13-21.
- 659 62 Hartig, F. 2021 DHARMA: residual diagnostics for hierarchical (multi-level/mixed) regression  
660 models. R package version 0.4.4., <https://CRAN.R-project.org/package=DHARMA>.
- 661 63 Lê, S., Josse, J., Husson, F. 2008 FactoMineR: an R package for multivariate analysis. *J. Stat. Softw.*  
662 **25**, 1-18.
- 663 64 Kembel, S. W., Cowan, P. D., Helmus, M. R., Cornwell, W. K., Morlon, H., Ackerly, D. D., Blomberg,  
664 S. P., Webb, C. O. 2010 Picante: R tools for integrating phylogenies and ecology. *Bioinform.* **26**, 1463-  
665 1464.
- 666 65 Bourne, A. R., Cunningham, S. J., Spottiswoode, C. N., Ridley, A. R. 2020 Compensatory breeding in  
667 years following drought in a desert-dwelling cooperative breeder. *Front. Ecol. Evol.* **8**, 190.
- 668 66 Cohen, J. 1992 Statistical Power Analysis. *Curr. Dir. Psychol. Sci.* **1**, 98-101.
- 669 67 Leon, A. C., Heo, M. 2009 Sample sizes required to detect interactions between two binary fixed-  
670 effects in a mixed-effects linear regression model. *Comput. Stat. Data Anal.* **53**, 603-608.
- 671 68 Champely, S. Package 'pwr'. R package version 1.3.0 2020 [cited; Available from: [https://CRAN.R-](https://CRAN.R-project.org/package=pwr)  
672 [project.org/package=pwr](https://CRAN.R-project.org/package=pwr)

- 673 69 Arden, R., Zietsch, B. P. 2017 An all-positive correlation matrix is not evidence of domain-general  
674 intelligence. *Behav. Brain Res.* **40**, e197.
- 675 70 Levine, D. A., Gross, A. L., Briceño, E. M., Tilton, N., Giordani, B. J., Sussman, J. B., Hayward, R. A.,  
676 Burke, J. F., Hingtgen, S., Elkind, M. S. 2021 Sex differences in cognitive decline among US adults. *AMA*  
677 *Netw. Open.* **4**, e210169-e210169.
- 678 71 Zwoinska, M. K., Kolm, N., Maklakov, A. A. 2013 Sex differences in cognitive ageing: testing  
679 predictions derived from life-history theory in a dioecious nematode. *Exp. Gerontol.* **48**, 1469-1472.
- 680 72 Benice, T., Rizk, A., Kohama, S., Pfankuch, T., Raber, J. 2006 Sex-differences in age-related cognitive  
681 decline in C57BL/6J mice associated with increased brain microtubule-associated protein 2 and  
682 synaptophysin immunoreactivity. *Neuroscience.* **137**, 413-423.
- 683 73 Medawar, P. 1952 *An unsolved problem in biology* London: HK Lewis.
- 684 74 Kirkwood, T. B., Rose, M. R. 1991 Evolution of senescence: late survival sacrificed for reproduction.  
685 *Philos. Trans. R. Soc. Lond., B, Biol. Sci.* **332**, 15-24.
- 686 75 Williams, G. C. 1957 Pleiotrophy, natural selection and the evolution of senescence. *Evolution.* **11**,  
687 393-411.
- 688 76 Nelson-Flower, M. J., Hockey, P. A., O’Ryan, C., English, S., Thompson, A. M., Bradley, K., Rose, R.,  
689 Ridley, A. R. 2013 Costly reproductive competition between females in a monogamous cooperatively  
690 breeding bird. *Proc. R. Soc. B: Biol. Sci.* **280**, 20130728.
- 691 77 Nelson-Flower, M. J., Ridley, A. R. 2015 Male-male competition is not costly to dominant males in  
692 a cooperatively breeding bird. *Behav. Ecol. Sociobiol.* **69**, 1997-2004.
- 693 78 Williams, T. D. 2005 Mechanisms underlying the costs of egg production. *Bioscience.* **55**, 39-48.
- 694 79 Mery, F., Kawecki, T. J. 2003 A fitness cost of learning ability in *Drosophila melanogaster*. *Proc. R.*  
695 *Soc. B: Biol. Sci.* **270**, 2465-2469.
- 696 80 Snell-Rood, E. C., Davidowitz, G., Papaj, D. R. 2011 Reproductive tradeoffs of learning in a butterfly.  
697 *Behav. Ecol.* **22**, 291-302.
- 698 81 Nelson-Flower, M. J., Hockey, P. A., O’Ryan, C., Ridley, A. R. 2012 Inbreeding avoidance  
699 mechanisms: dispersal dynamics in cooperatively breeding southern pied babblers. *J. Anim. Ecol.* **81**,  
700 876-883.
- 701 82 Raihani, N. J., Ridley, A. R., Browning, L. E., Nelson-Flower, M. J., Knowles, S. 2008 Juvenile female  
702 aggression in cooperatively breeding pied babblers: causes and contexts. *Ethology.* **114**, 452-458.
- 703 83 Nelson-Flower, M. J., Ridley, A. R. 2016 Nepotism and subordinate tenure in a cooperative breeder.  
704 *Biol. Lett.* **12**, 20160365.
- 705 84 Nelson-Flower, M. J., Wiley, E. M., Flower, T. P., Ridley, A. R. 2018 Individual dispersal delays in a  
706 cooperative breeder: Ecological constraints, the benefits of philopatry and the social queue for  
707 dominance. *J. Anim. Ecol.* **87**, 1227-1238.
- 708 85 Ashton, B. J., Kennedy, P., Radford, A. N. 2020 Interactions with conspecific outsiders as drivers of  
709 cognitive evolution. *Nat. Commun.* **11**, 1-9.
- 710 86 Madden, J. R., Langley, E. J. G., Whiteside, M. A., Beardsworth, C. E., van Horik, J. O. 2018 The quick  
711 are the dead: pheasants that are slow to reverse a learned association survive for longer in the wild.  
712 *Philos. Trans. R. Soc. Lond., B, Biol. Sci.* **373**, 20170297.
- 713 87 Ridley, A. R. 2007 Factors affecting offspring survival and development in a cooperative bird: social,  
714 maternal and environmental effects. *J. Anim. Ecol.*, 750-760.
- 715 88 Cole, E. F., Morand-Ferron, J., Hinks, A. E., Quinn, J. L. 2012 Cognitive ability influences reproductive  
716 life history variation in the wild. *Curr. Biol.* **22**, 1808-1812.
- 717 89 Johnson-Ulrich, L., Benson-Amram, S., Holekamp, K. E. 2019 Fitness consequences of innovation in  
718 spotted hyenas. *Front. Ecol. Evol.* **7**, 443.
